# Supplementary material for: Ternary nanocomposite ReMIL-CN (ReSe 2 @MIL-53(Fe)@g-C 3 N 4 ) for energy storage and electroactive integrated H 2 O 2 sensor application
Source: Royal Society of Chemistry journal article supplement (doi:10.1039/d5ra06541k), 2025-01-01
Supplement: d5ra06541k1.pdf [file d5ra06541k1.pdf]

## Supplementary Data

### **Title: Ternary nanocomposite ReMIL-CN (ReSe<sub>2</sub>@MIL-53(Fe)@g-C<sub>3</sub>N<sub>4</sub>) for Energy Storage and Electroactive Integrated H<sub>2</sub>O<sub>2</sub> Sensor Application**

Sohail Mumtaz<sup>1</sup>, Sameerah I. Al-Saeedi<sup>2</sup>, Saba Khalil<sup>3\*</sup>, Abhinav Kumar<sup>4,5\*</sup>, Amir Muhammad Afzal<sup>1</sup>, M.A. Diab<sup>\*6,7</sup>, Heba A. El-Sabban<sup>\*8,9</sup>

<sup>1</sup>Department of Chemical and Biological Engineering, Gachon University, 1342 Seongnamdaero, Sujeong-gu, Seongnam-si 13120, Republic of Korea

<sup>2</sup>Department of Chemistry, College of Science, Princess Nourah bint Abdulrahman University, P.O. Box 84428, Riyadh, 11671, Saudi Arabia

<sup>3</sup>Department of Physics, Riphah International University, Campus Lahore, Lahore, Pakistan

<sup>4</sup>Department of Nuclear and Renewable Energy, Ural Federal University Named after the First President of Russia Boris Yeltsin, Ekaterinburg 620002, Russia

<sup>5</sup>Refrigeration & Air-condition Department, Technical Engineering College, The Islamic University, Najaf, Iraq

<sup>6</sup>Department of Biotechnology, Yeungnam University, Gyeongsan, Gyeongbuk 38541, South Korea

<sup>7</sup>Water Analysis Department, Central Public Health Laboratories, Ministry of Health and Population, Cairo 11613, Egypt

<sup>8</sup>Integrated Materials Chemistry Laboratory, School of Materials Science and Engineering, Yeungnam University, Gyeongsan 38541, Republic of Korea

<sup>9</sup>Analysis and Evaluation Department, Egyptian Petroleum Research Institute (EPRI), 1 Ahmed El Zomor St. Nasr City, Cairo 11727, Egypt

Saba Khalil ([sabakhalil537@gmail.com](mailto:sabakhalil537@gmail.com))

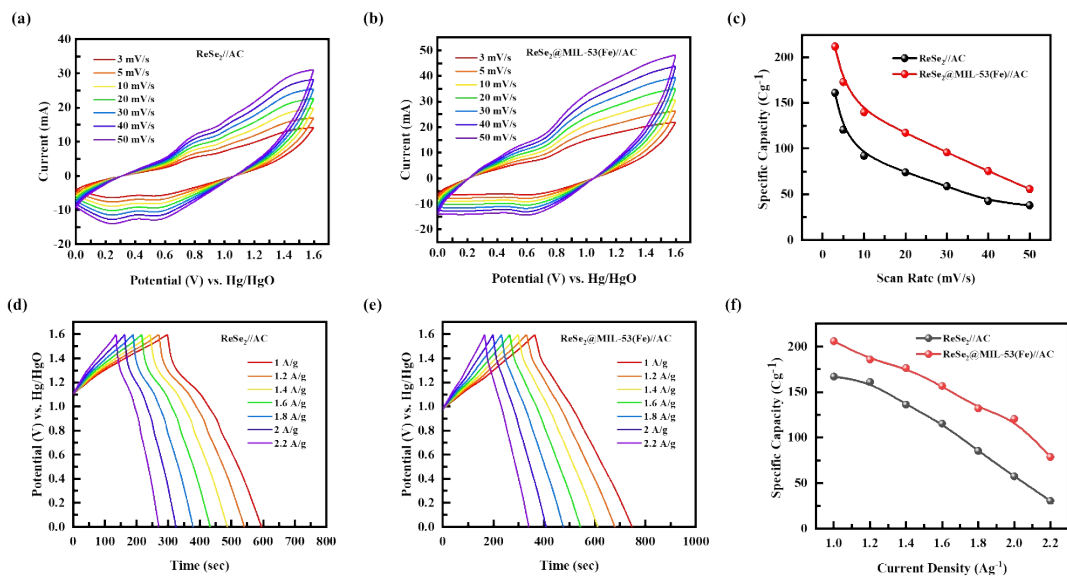

**Figure S1:** Device level performance of (a-c)  $\text{ReSe}_2//\text{AC}$ , (d-f)  $\text{ReSe}_2@MIL-53//\text{AC}$ .

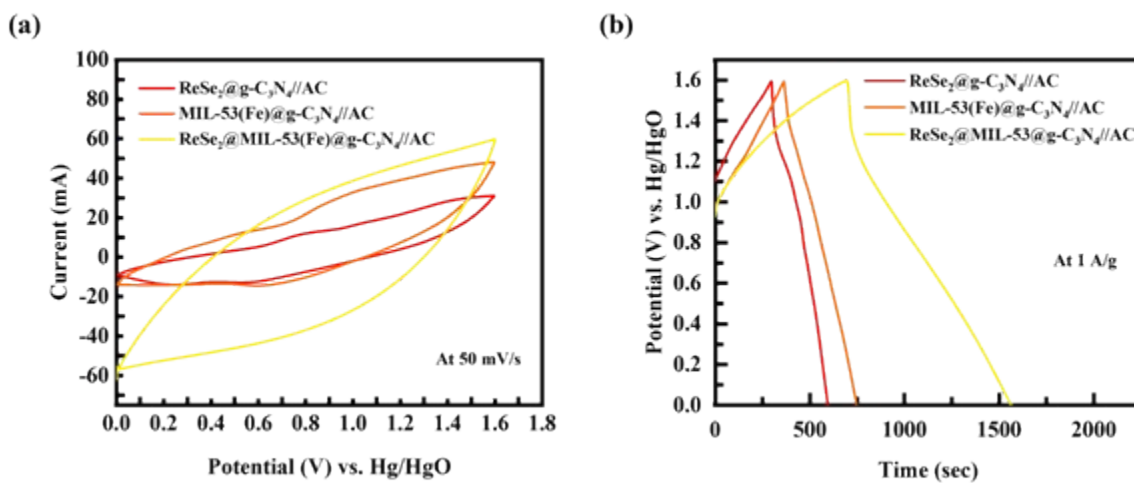

**Figure S2:** Comparison of device level performance of  $\text{ReSe}_2//\text{AC}$ ,  $\text{ReSe}_2@MIL-53//\text{AC}$ , and  $\text{ReMIL-CN//AC}$  ( $\text{ReSe}_2@MIL-53@g-C_3N_4//\text{AC}$ ) systems.

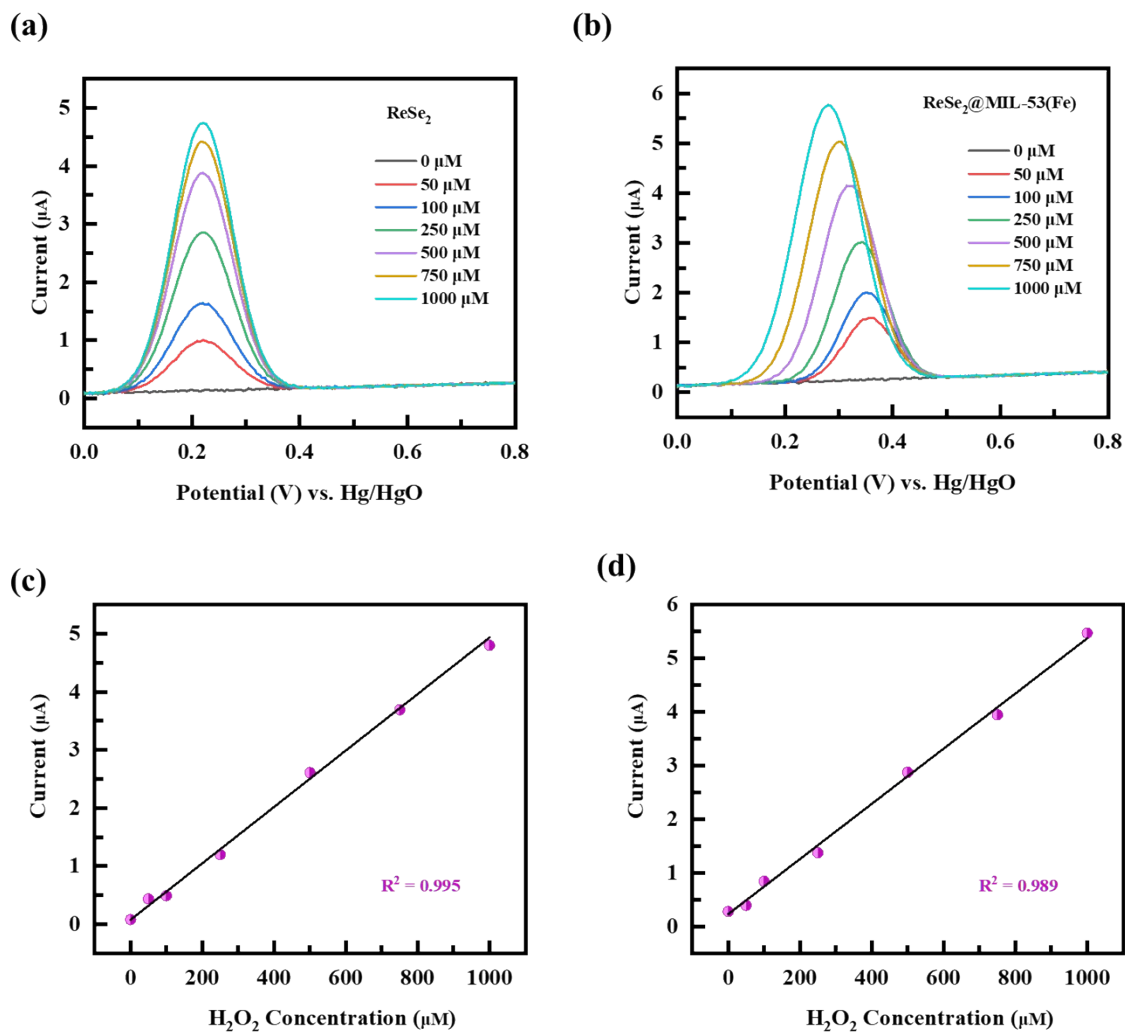

**Figure S3:** (a-d) DPV curves and calibration plots of ReSe<sub>2</sub> and ReSe<sub>2</sub>@MIL-53 composite

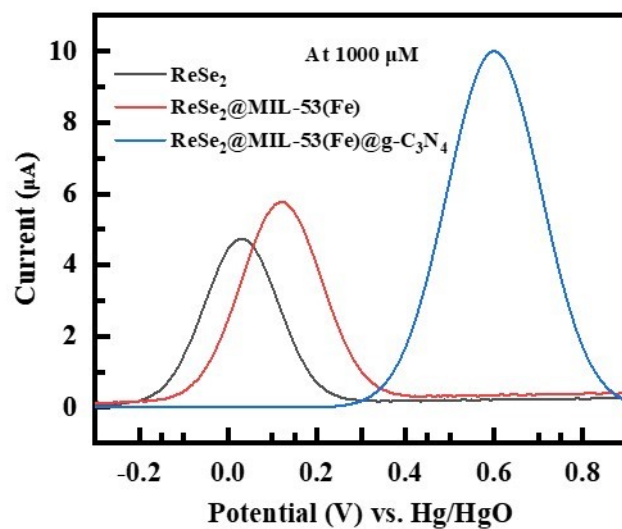

**Figure S4:** DPV comparison plots of the ReSe<sub>2</sub>, ReSe<sub>2</sub>@MIL-53, and ReSe<sub>2</sub>@MIL-532g-C<sub>3</sub>N<sub>4</sub>-electrodes for H<sub>2</sub>O<sub>2</sub> detection system.
